# Supplementary material
Source: bioRxiv or medRxiv preprint supplement (https://medrxiv.org/highwire/filestream/69537/field_highwire_adjunct_files/2/19009274-3.pdf)
Supplement: Supplementary file [file 19009274-3.pdf]

**Supplementary Table 3. Data combined from the DACHS and DFCI cohorts and seven published studies reporting on the age-specific prevalence of molecular CRC subtypes stratified by *BRAF* and MSI analysis (see references below).**

| Study                           | <50         |             |                   | 50-59       |              |                   | 60-69       |              |                   | >70         |              |                   |
|---------------------------------|-------------|-------------|-------------------|-------------|--------------|-------------------|-------------|--------------|-------------------|-------------|--------------|-------------------|
|                                 | all CRC     | MSI CRC     | BRAF-mut. MSI CRC | all CRC     | MSI CRC      | BRAF-mut. MSI CRC | all CRC     | MSI CRC      | BRAF-mut. MSI CRC | all CRC     | MSI CRC      | BRAF-mut. MSI CRC |
| DACHS                           | 105         | 14          | 0                 | 276         | 25           | 3                 | 639         | 60           | 25                | 1026        | 128          | 65                |
| DFCI                            | 6           | 0           | 0                 | 58          | 5            | 2                 | 175         | 28           | 13                | 289         | 58           | 38                |
| Seppälä et al. <sup>1</sup>     | 37          | 9           | 0                 | 103         | 7            | 3                 | 186         | 20           | 11                | 436         | 68           | 46                |
| Phipps et al. <sup>2</sup>      | 142         | 16          | 1                 | 327         | 22           | 7                 | 450         | 61           | 51                | 270         | 51           | 41                |
| Murcia et al. <sup>3</sup>      | 33          | 3           | 0                 | 67          | 7            | 2                 | 157         | 15           | 9                 | 420         | 24           | 14                |
| Schofield et al. <sup>4*</sup>  | 444         | 52          | 0                 | 900         | 53           | 7                 |             |              |                   |             |              |                   |
| Goshayeshi et al. <sup>5*</sup> | 123         | 13          | 0                 |             |              |                   |             |              |                   |             |              |                   |
| Suzuki et al. <sup>6*</sup>     | 119         | 10          | 1                 |             |              |                   |             |              |                   |             |              |                   |
| Hampel et al. <sup>7</sup>      | 87          | 7           | 0                 |             |              |                   |             |              |                   |             |              |                   |
| Total                           | 1096        | 124         | 2                 | 1731        | 119          | 24                | 1607        | 184          | 109               | 2441        | 329          | 204               |
| <b>BRAF mut %</b>               | <b>0.2%</b> | <b>1.6%</b> |                   | <b>1.4%</b> | <b>20.2%</b> |                   | <b>6.8%</b> | <b>59.2%</b> |                   | <b>8.4%</b> | <b>62.0%</b> |                   |

\*Only MLH1-deficient CRCs tested for BRAF

Gray cells – no respective patients were available for the analysis of somatic BRAF mutations

1. Seppala TT, Bohm JP, Friman M, et al: Combination of microsatellite instability and BRAF mutation status for subtyping colorectal cancer. *Br J Cancer* 112:1966-75, 2015
2. Phipps AI, Limburg PJ, Baron JA, et al: Association between molecular subtypes of colorectal cancer and patient survival. *Gastroenterology* 148:77-87.e2, 2015
3. Murcia O, Juarez M, Rodriguez-Soler M, et al: Colorectal cancer molecular classification using BRAF, KRAS, microsatellite instability and CIMP status: Prognostic implications and response to chemotherapy. *PLoS One* 13:e0203051, 2018
4. Schofield L, Watson N, Grieu F, et al: Population-based detection of Lynch syndrome in young colorectal cancer patients using microsatellite instability as the initial test. *Int J Cancer* 124:1097-102, 2009
5. Goshayeshi L, Ghaffarzadegan K, Khooei A, et al: Prevalence and clinicopathological characteristics of mismatch repair-deficient colorectal carcinoma in early onset cases as compared with late-onset cases: a retrospective cross-sectional study in Northeastern Iran. *BMJ Open* 8:e023102, 2018
6. Suzuki O, Eguchi H, Chika N, et al: Prevalence and clinicopathologic/molecular characteristics of mismatch repair-deficient colorectal cancer in the under-50-year-old Japanese population. *Surg Today* 47:1135-1146, 2017
7. Hampel H, Pearlman R, Beightol M, et al: Assessment of Tumor Sequencing as a Replacement for Lynch Syndrome Screening and Current Molecular Tests for Patients With Colorectal Cancer. *JAMA Oncol* 4:806-813, 2018
